# Supplementary material
Source: Research Square preprint supplement (doi:10.21203/rs.3.rs-9215788/v1)
Supplement: Supplementary file 1 [file 402428d238f71185d060c4f9.xlsx]

## Sheet: xxx
Age	sex	Residence	Occupation	Marital_Status	Education	ART_Regime	TB_History	Smoking_History	Khat	Alchol	Herbal_Medicine	ART_Adherance	Nutrition	HBV_Vaccine	ALT_Baseline	AST_Baseline	BIL_T	ALT_Final	AST_Final	CD4_Recent	Viral_load	HBV	HCV	Abdominal_Ultrasound	BMI	alt_high	ast_high	bili_high	liver_disease	age_catagory	HIV_DUR_Y	ART_DUR_Y	HIV_DUR_CAT	ART_DUR_CAT	Low_CD4	Undernutrition	Low_Income	DTG_Regimen	BMI_CAT
45	2	0	3	2	1	2	1	0	0	0	1	2	3	0	89	98	3	160	190	200	1	0	0		17	1	1	0	1	0	8.33333	8.33333	1	1	0	1	0	0	2
62	1	1	1	1	3	1	0	0	0	0	0	2	3	2	39.99	35.62	4	#NULL!	#NULL!	400	0	0	0	Normal	23	#NULL!	#NULL!	1	1	1	6.5	6.5	1	1	0	0	0	1	1
44	1	1	1	3	2	1	1	1	1	1	1	2	3	1	20	30	10	#NULL!	#NULL!	320	1	2	2	Hepatomegaly	16.5	#NULL!	#NULL!	1	1	0	4.66667	4.5	0	1	0	1	0	1	2
43	2	1	1	2	4	3	0	0	0	0	0	2	3	2	94	28.9	#NULL!	46.6	31	270	0	0	0	Normal	17	1	0	#NULL!	1	0	9	9	1	1	0	1	0	0	2
45	2	1	1	3	3	1	0	0	0	0	0	2	3	2	10	15	#NULL!	#NULL!	#NULL!	996	0	0	0	Normal	20	#NULL!	#NULL!	#NULL!	0	0	4.66667	4.16667	0	1	0	0	0	1	1
52	1	1	3	2	2	4	0	0	0	1	0	2	3	0	26	21	2	59	69	290	0	0	0		14.5	0	1	0	1	1	18.8333	18.8333	1	1	0	1	0	0	2
40	2	1	1	3	2	1	1	0	0	0	0	2	3	2	16.7	21.7	2	21.9	27.6	320	0	0	0		23	0	0	#NULL!	0	0	19.9167	19.9167	1	1	0	0	1	1	1
25	2	1	1	1	4	1	0	0	0	0	0	2	4	0	26	25	1	35	34	1072	0	2	2		18	0	0	0	0	0	18.5	18.5	1	1	0	1	0	1	2
66	2	1	3	4	1	1	0	0	0	0	0	2	2	0	18.4	31.8	#NULL!	#NULL!	#NULL!	387	0	2	2	No	20	#NULL!	#NULL!	#NULL!	0	1	14.4167	13.4167	1	1	0	0	#NULL!	1	1
48	2	1	2	3	2	1	0	0	0	0	0	2	3	0	26	21	1	15	16	891	0	2	2	Not done	20	0	0	0	0	0	18	18	1	1	0	0	#NULL!	1	1
58	2	1	2	4	2	1	1	0	0	0	0	2	3	0	24	41.2	3	#NULL!	#NULL!	250	0	2	2	No	23	#NULL!	#NULL!	0	0	1	9.91667	9.83333	1	1	0	0	#NULL!	1	1
40	2	1	1	2	3	1	0	0	0	1	0	2	3	2	20	26	#NULL!	12	17	510	0	0	2		27	0	0	#NULL!	0	0	22.4167	14.4167	1	1	0	0	0	1	3
50	2	1	3	4	1	1	0	0	0	0	0	2	3	0	40	27	1	36	23	110	0	2	2	No	20	0	0	0	0	0	16	12.9167	1	1	1	0	#NULL!	1	1
68	2	1	3	3	1	4	0	0	0	1	0	2	3	0	15	33	#NULL!	12.1	27.7	449	0	2	2	Normal	26.4	0	0	#NULL!	0	1	13.3333	15	1	1	0	0	0	0	3
53	1	1	3	2	3	1	1	0	0	0	0	2	3	0	40	54	5	#NULL!	#NULL!	933	0	2	2		24	#NULL!	#NULL!	1	1	1	15.4167	15.4167	1	1	0	0	0	1	1
45	1	1	3	2	2	1	0	0	0	0	0	3	3	0	25	32	#NULL!	24	42	333	0	0	0		24.3	0	0	#NULL!	0	0	17.3333	12.6667	1	1	0	0	0	1	1
49	1	1	3	2	3	1	0	0	0	0	0	2	3	0	24	23	2	49	44	583	0	0	0		18.9	0	0	0	0	0	17	17	1	1	0	0	0	1	1
50	2	1	3	3	1	1	0	0	0	0	0	2	3	0	38	33	#NULL!	31	26	1053	0	2	2		16	0	0	#NULL!	0	0	16.1667	16.3333	1	1	0	1	#NULL!	1	2
21	1	1	3	1	3	1	1	0	0	0	0	2	3	0	15	20	#NULL!	26	36	566	0	2	2		19.5	0	0	#NULL!	0	0	17.0833	17.0833	1	1	0	0	#NULL!	1	1
24	2	1	3	2	2	1	0	0	0	0	0	2	3	0	17	34	#NULL!	50	59	645	0	0	0	Normal	18	0	0	#NULL!	0	0	18	15.4167	1	1	0	1	0	1	2
45	1	1	3	2	2	3	1	0	0	1	0	1	3	0	23	14	#NULL!	40	18	185	1	0	0	Normal	19.8	0	0	#NULL!	0	0	18.25	18.25	1	1	1	0	0	0	1
18	2	1	3	1	3	1	0	0	0	0	0	1	4	0	9.8	18.5	1	#NULL!	#NULL!	798	1	2	2		19	#NULL!	#NULL!	0	0	0	18.3333	18.3333	1	1	0	0	#NULL!	1	1
48	2	0	3	2	2	1	0	0	0	0	0	2	3	0	44	69	3	#NULL!	#NULL!	450	0	0	0	Normal	17.6	#NULL!	1	0	1	0	25.9167	17.9167	1	1	0	1	0	1	2
53	2	1	3	2	1	1	1	0	0	0	0	1	3	0	44	53	3.1	#NULL!	#NULL!	700	1	2	2		18	#NULL!	#NULL!	1	1	1	17.25	17.25	1	1	0	1	1	1	2
65	2	1	3	4	1	1	0	0	0	0	0	2	3	0	49.4	70.2	4	#NULL!	#NULL!	858	0	2	2	Normal	17.3	#NULL!	1	1	1	1	19.3333	17.5833	1	1	0	1	1	1	2
40	2	1	3	2	2	3	0	0	0	0	0	1	3	0	39	26	#NULL!	#NULL!	#NULL!	62	1	2	2		19.2	#NULL!	#NULL!	#NULL!	0	0	1.41667	1.41667	0	0	1	0	0	0	1
28	1	1	3	1	2	4	1	0	0	1	0	1	3	0	97	41	2	31	23	166	1	2	2		18.9	1	0	0	1	0	1.5	1.25	0	0	1	0	0	0	1
36	2	0	3	2	2	3	0	0	0	0	0	2	3	0	23.91	20.13	#NULL!	#NULL!	#NULL!	538	0	0	0	Normal	18.4	#NULL!	#NULL!	#NULL!	0	0	1.66667	1.58333	0	0	0	1	1	0	2
73	2	0	3	4	1	1	1	0	0	0	0	2	3	0	21	27	#NULL!	25	48	725	0	2	2		17.3	0	0	#NULL!	0	1	1.41667	1.41667	0	0	0	1	0	1	2
50	2	1	2	3	3	1	0	0	0	0	0	2	3	0	63	48	7	68	48	503	0	2	2		17	1	0	1	1	0	1.5	1.08333	0	0	0	1	0	1	2
46	2	1	3	3	4	3	0	0	0	0	0	2	3	0	28	26	#NULL!	#NULL!	#NULL!	389	0	0	0	Normal	17.4	#NULL!	#NULL!	#NULL!	0	0	#NULL!	#NULL!	#NULL!	#NULL!	0	1	1	0	2
49	1	1	2	2	3	1	1	0	0	0	0	1	3	0	28.2	29.5	#NULL!	#NULL!	#NULL!	437	1	2	2		18.3	#NULL!	#NULL!	#NULL!	0	0	#NULL!	#NULL!	#NULL!	#NULL!	0	1	0	1	2
54	2	1	3	4	2	1	0	0	0	0	0	2	3	0	25	26	#NULL!	29	328.5	807	0	2	2		22	0	1	#NULL!	1	1	#NULL!	#NULL!	#NULL!	#NULL!	0	0	0	1	1
46	1	1	3	2	2	1	0	0	1	0	0	2	3	0	29.3	32	#NULL!	#NULL!	#NULL!	496	0	2	2	Liver hematoma	19.2	#NULL!	#NULL!	#NULL!	0	0	#NULL!	#NULL!	#NULL!	#NULL!	0	0	0	1	1
44	1	1	2	2	3	1	1	1	1	0	0	2	3	0	26	28	#NULL!	#NULL!	#NULL!	465	0	2	2		21	#NULL!	#NULL!	#NULL!	0	0	#NULL!	16.5	#NULL!	1	0	0	0	1	1
45	2	1	1	4	5	1	0	0	0	0	1	2	3	0	28	27	#NULL!	27	20	664	0	2	2	Yes	22	0	0	#NULL!	0	0	1.66667	1.66667	0	0	0	0	0	1	1
38	2	1	2	2	2	1	0	0	0	0	0	2	3	0	32	22	#NULL!	#NULL!	#NULL!	1115	0	2	2		33	#NULL!	#NULL!	#NULL!	0	0	1.5	0.666667	0	0	0	0	0	1	3
67	2	1	3	2	2	1	0	0	0	0	0	2	3	0	17	15	#NULL!	11	29	486	0	2	2		32	0	0	#NULL!	0	1	1.5	1.08333	0	0	0	0	0	1	3
50	2	1	3	4	3	1	0	0	0	0	0	3	3	0	44	47	4	47	25	768	0	2	2		24.5	0	0	1	1	0	1.66667	1.66667	0	0	0	0	0	1	1
38	2	1	2	2	1	1	1	0	0	0	0	2	3	0	20	26	#NULL!	#NULL!	#NULL!	560	0	2	2		20	#NULL!	#NULL!	#NULL!	0	0	1	1	0	0	0	0	0	1	1
47	2	1	1	4	4	1	1	0	0	0	0	2	3	0	14	17	#NULL!	17	20	618	0	2	2		23.5	0	0	#NULL!	0	0	1.25	1.25	0	0	0	0	0	1	1
40	2	1	2	2	3	1	0	0	0	0	0	2	3	0	12	26	#NULL!	#NULL!	#NULL!	560	0	0	2		24	#NULL!	#NULL!	#NULL!	0	0	19	19	1	1	0	0	#NULL!	1	1
19	1	1	3	1	3	1	0	0	0	0	0	2	3	0	23.2	36	#NULL!	23	38	430	0	2	2		21	0	0	#NULL!	0	0	20	18	1	1	0	0	#NULL!	1	1
45	2	1	3	2	3	1	1	0	0	0	0	2	3	0	42	44	4	29	36	570	0	2	2		22	0	0	1	1	0	17.0833	17.0833	1	1	0	0	#NULL!	1	1
56	1	1	2	2	3	1	0	0	0	0	0	2	3	0	106	171	2	22	119	527	0	2	2		21	1	1	0	1	1	20	20	1	1	0	0	0	1	1
39	2	1	1	2	3	1	0	0	0	0	0	2	3	2	27	20	#NULL!	22	18	719	0	2	2		19	0	0	#NULL!	0	0	1.91667	1.08333	0	0	0	0	0	1	1
52	1	1	2	2	3	1	1	0	0	0	0	2	3	0	44	31	6	36	23	674	0	2	2		26	0	0	1	1	1	20	19.5	1	1	0	0	0	1	3
54	1	1	3	3	2	4	0	0	0	1	0	1	3	0	160	113	5	21	29	315	0	2	2		19	1	1	1	1	1	19	18	1	1	0	0	#NULL!	0	1
21	1	1	3	1	3	5	0	0	0	0	0	2	3	0	17	33	#NULL!	16	14	340	0	2	2		22	0	0	#NULL!	0	0	20	19.6667	1	1	0	0	#NULL!	1	1
44	1	1	2	2	2	1	0	0	0	1	0	2	3	0	20	19	#NULL!	19	31	320	0	2	2		18	0	0	#NULL!	0	0	19	18.3333	1	1	0	1	#NULL!	1	2
45	1	1	1	2	5	6	0	0	1	0	0	2	3	0	30	31	#NULL!	44.4	35.1	421	0	2	2		25.4	0	0	#NULL!	0	0	#NULL!	#NULL!	#NULL!	#NULL!	0	0	0	1	3
55	1	1	1	2	5	4	1	1	1	1	0	1	3	0	77	60	1.7	58	63	779	1	2	2	Normal	26.2	1	1	0	1	1	#NULL!	#NULL!	#NULL!	#NULL!	0	0	0	0	3
45	1	1	3	1	3	1	0	0	0	0	0	2	3	0	29	37	#NULL!	76	26	617	0	2	2		20.4	1	0	#NULL!	1	0	1.66667	1.66667	0	0	0	0	0	1	1
46	1	1	2	3	2	1	0	0	0	0	0	2	3	0	16	22	#NULL!	38	47	251	0	2	2		18.6	0	0	#NULL!	0	0	1.5	0.666667	0	0	0	0	0	1	1
45	2	0	2	2	3	1	0	0	0	0	0	3	#NULL!	2	20	30	2	#NULL!	#NULL!	250	1	2	2		20	#NULL!	#NULL!	0	0	0	1.5	1.08333	0	0	0	0	#NULL!	1	1
39	2	0	3	4	1	1	0	0	0	0	0	2	3	0	16	24	#NULL!	#NULL!	#NULL!	414	0	2	2		19.8	#NULL!	#NULL!	#NULL!	0	0	1.66667	1.66667	0	0	0	0	#NULL!	1	1
45	1	1	2	2	4	1	0	0	0	1	0	2	3	0	31	37	#NULL!	#NULL!	#NULL!	340	0	2	2		22.4	#NULL!	#NULL!	#NULL!	0	0	1	1	0	0	0	0	#NULL!	1	1
55	2	1	3	4	2	1	0	0	0	0	0	2	3	0	25	19.6	#NULL!	24	25.6	527	0	0	0	Normal	28.6	0	0	#NULL!	0	1	1.25	1.25	0	0	0	0	#NULL!	1	3
34	2	1	3	4	2	1	0	0	0	0	0	2	3	0	25	19.6	#NULL!	24	25.6	329	0	0	0	Normal	28.6	0	0	#NULL!	0	0	19	19	1	1	0	0	0	1	3
39	1	1	3	2	2	1	0	0	0	0	0	2	3	0	29.4	26.1	#NULL!	#NULL!	#NULL!	459	0	2	2		21.4	#NULL!	#NULL!	#NULL!	0	0	20	18	1	1	0	0	0	1	1
51	1	0	3	2	2	1	0	0	0	0	0	2	3	0	23.3	25	3	#NULL!	#NULL!	410	0	2	2		21	#NULL!	#NULL!	0	0	1	17.0833	17.0833	1	1	0	0	0	1	1
45	2	0	3	3	1	4	1	0	0	0	0	2	3	0	19.8	23.5	#NULL!	#NULL!	#NULL!	398	0	2	2		18.6	#NULL!	#NULL!	#NULL!	0	0	20	20	1	1	0	0	1	0	1
53	2	1	3	3	2	1	0	0	0	0	0	2	3	0	26	27	2	#NULL!	#NULL!	450	0	2	2	Normal	22.64	#NULL!	#NULL!	0	0	1	1.91667	1.08333	0	0	0	0	0	1	1
60	1	1	1	3	3	1	0	1	1	1	0	1	3	0	35	42	1	#NULL!	#NULL!	212	#NULL!	0	0		18	#NULL!	#NULL!	0	0	1	20	19.5	1	1	0	1	0	1	2
67	1	1	1	3	3	1	0	1	1	1	0	1	3	0	35	43	1	#NULL!	#NULL!	212	#NULL!	0	0	Normal	17	#NULL!	#NULL!	0	0	1	#NULL!	#NULL!	#NULL!	#NULL!	0	1	0	1	2
46	2	1	3	2	2	1	1	0	0	0	0	2	3	0	6	22	#NULL!	33	38	766	0	0	0	Normal	22.36	0	0	#NULL!	0	0	1.66667	1.66667	0	0	0	0	0	1	1
51	2	1	3	4	2	1	1	0	0	0	0	2	3	0	41	33	3.4	53	30	527	0	0	0		28.8	0	0	1	1	1	1.5	0.666667	0	0	0	0	0	1	3
55	1	1	1	2	5	4	1	1	1	1	0	1	3	0	87	66	2	65	69	670	0	0	0		27.4	1	1	0	1	1	1.5	1.08333	0	0	0	0	0	0	3
47	2	1	3	2	3	4	0	0	0	0	0	2	3	0	30	34	0.38	29.3	33.7	629	0	2	2		23.65	0	0	0	0	0	1.66667	1.66667	0	0	0	0	0	0	1
53	2	1	3	2	1	1	0	0	0	0	0	2	3	0	8	36	#NULL!	#NULL!	25	488	0	2	2		22	#NULL!	0	#NULL!	0	1	1	1	0	0	0	0	0	1	1
47	2	0	3	4	3	1	0	#NULL!	0	0	0	2	3	0	44	34	#NULL!	40	42	445	0	2	2		23.6	0	0	#NULL!	0	0	1.25	1.25	0	0	0	0	1	1	1
48	2	0	3	2	2	1	0	0	0	0	0	2	#NULL!	0	44	69	#NULL!	26	41	450	0	0	0	Normal	17.8	0	1	#NULL!	1	0	19	19	1	1	0	1	1	1	2
59	1	1	1	2	5	3	1	0	1	0	0	1	3	0	22	20	#NULL!	39	27	351	0	2	2		20.7	0	0	#NULL!	0	1	20	18	1	1	0	0	0	0	1
49	1	1	3	2	2	4	0	0	0	0	0	2	3	0	37	37	#NULL!	31	29	252	0	2	2		21.52	0	0	#NULL!	0	0	17.0833	17.0833	1	1	0	0	0	0	1
49	1	1	3	2	2	1	0	0	1	0	0	1	3	0	28	29	5	#NULL!	#NULL!	437	1	2	2		25	#NULL!	#NULL!	1	1	0	17	17	1	1	0	0	0	1	3
45	2	0	3	4	1	1	1	0	0	0	0	2	3	0	35	32	#NULL!	#NULL!	#NULL!	398	0	2	2		196	#NULL!	#NULL!	#NULL!	0	0	15.5	15.5	1	1	0	0	1	1	3
26	2	1	3	1	3	4	0	0	0	0	0	2	3	0	19	26	#NULL!	#NULL!	#NULL!	367	0	2	2		24	#NULL!	#NULL!	#NULL!	0	0	18	15.4167	1	1	0	0	1	0	1
36	1	1	2	3	3	1	0	0	0	0	0	2	3	0	28	27	#NULL!	#NULL!	#NULL!	444	0	2	2		23.53	#NULL!	#NULL!	#NULL!	0	0	18.25	18.25	1	1	0	0	#NULL!	1	1
66	1	0	3	4	1	1	1	0	0	1	0	2	3	0	36	29	#NULL!	#NULL!	#NULL!	#NULL!	0	2	2		19.4	#NULL!	#NULL!	#NULL!	0	1	18.3333	18.3333	1	1	#NULL!	0	1	1	1
41	2	1	2	3	2	4	0	0	0	0	0	1	3	0	39	45	#NULL!	35	53	284	1	0	0	Normal	19.63	0	0	#NULL!	0	0	25.9167	17.9167	1	1	0	0	0	0	1
51	2	1	2	3	2	1	0	0	0	0	0	2	3	0	48	50	4	40	41	409	0	0	0	Normal	23.62	0	0	1	1	1	17.25	17.25	1	1	0	0	0	1	1
66	2	1	3	4	1	1	0	0	0	0	0	2	3	0	23	50	#NULL!	36	57	200	0	2	2	Normal	14.05	0	0	#NULL!	0	1	19.3333	17.5833	1	1	0	1	1	1	2
40	2	1	3	4	2	1	1	0	0	0	0	2	#NULL!	0	21	21	#NULL!	26	25	1129	0	2	2		22	0	0	#NULL!	0	0	18	15.4167	1	1	0	0	#NULL!	1	1
50	2	1	2	3	3	4	0	0	0	0	0	2	3	0	23	21	#NULL!	17	23	359	0	2	2		30	0	0	#NULL!	0	0	18.25	18.25	1	1	0	0	#NULL!	0	3
62	2	1	3	4	2	1	0	0	0	0	0	2	3	0	46	41	3	23	42.6	1089	0	2	2		21	0	0	0	0	1	18.3333	18.3333	1	1	0	0	1	1	1
20	2	1	1	1	3	1	0	0	0	1	0	2	3	0	15	51	#NULL!	21	38	668	0	2	2		24	0	0	#NULL!	0	0	25.9167	17.9167	1	1	0	0	#NULL!	1	1
38	2	1	3	2	2	1	0	0	0	0	0	2	3	0	7	24	#NULL!	21	19	580	0	2	2		25	0	0	#NULL!	0	0	17.25	17.25	1	1	0	0	0	1	3
38	2	1	3	2	3	1	0	0	0	0	0	2	3	0	10	19	#NULL!	20	23	844	0	2	2		25	0	0	#NULL!	0	0	19.3333	17.5833	1	1	0	0	#NULL!	1	3
33	2	1	2	4	1	1	1	0	0	0	0	2	3	0	20	35	#NULL!	11	24	483	0	2	2		19.5	0	0	#NULL!	0	0	1.41667	1.41667	0	0	0	0	#NULL!	1	1
36	2	0	3	4	1	1	0	0	0	0	0	2	3	0	20	24	#NULL!	23	21	713	0	2	2		21	0	0	#NULL!	0	0	1.5	1.25	0	0	0	0	0	1	1
54	1	1	2	2	2	5	0	0	0	0	0	2	3	0	45	34	4.5	#NULL!	#NULL!	645	0	2	2		20.5	#NULL!	#NULL!	1	1	1	1.66667	1.58333	0	0	0	0	0	1	1
44	1	1	3	3	3	1	1	0	0	0	0	2	3	0	33	39	#NULL!	#NULL!	#NULL!	780	0	2	2		26	#NULL!	#NULL!	#NULL!	0	0	1.41667	1.41667	0	0	0	0	0	1	3
40	1	0	2	2	1	1	0	0	0	0	0	2	3	0	30	28	#NULL!	49	43	585	0	2	2		28	0	0	#NULL!	0	0	1.5	1.5	0	0	0	0	0	1	3
44	2	1	3	2	2	1	0	0	0	0	0	3	3	0	21	20	#NULL!	#NULL!	30	765	0	2	2		29.5	#NULL!	0	#NULL!	0	0	1.5	1.5	0	0	0	0	0	1	3
24	2	1	2	3	1	4	1	0	0	0	0	1	3	0	38	32	3.3	37	18	223	1	2	2		24	0	0	1	1	0	1.5	0.916667	0	0	0	0	0	0	1
60	1	1	2	3	3	1	1	0	0	0	0	1	3	0	47	83	4	25	60	766	1	2	2		18	0	1	1	1	1	1.5	1.5	0	0	0	1	0	1	2
80	2	1	2	4	2	1	0	0	0	0	0	2	3	0	33	23	#NULL!	27	21	144	0	2	2		17	0	0	#NULL!	0	1	1.66667	1.58333	0	0	1	1	0	1	2
66	1	1	2	3	3	1	1	0	0	0	0	1	3	0	204	164	4	11	25	401	1	2	2		18.5	1	1	1	1	1	1.5	1.5	0	0	0	0	0	1	1
65	2	0	2	3	1	1	0	0	0	0	0	2	3	0	40	41	#NULL!	24.5	37.5	490	0	2	2		16.5	0	0	#NULL!	0	1	1.66667	1.16667	0	0	0	1	0	1	2
65	1	1	3	2	3	3	0	0	0	0	0	2	3	0	30	30	3.1	#NULL!	#NULL!	569	0	2	2		24	#NULL!	#NULL!	1	1	1	1.5	1.33333	0	0	0	0	0	0	1
68	2	1	2	4	2	1	0	0	0	0	0	2	3	0	11	21	#NULL!	25	29	474	0	2	2		21	0	0	#NULL!	0	1	1.5	1.5	0	0	0	0	0	1	1
60	1	1	3	4	1	1	1	0	0	0	0	2	3	0	25	24	#NULL!	57	23	196	0	2	2		15	0	0	#NULL!	0	1	8.58333	8.58333	1	1	1	1	0	1	2
22	2	1	3	1	3	1	0	0	0	0	0	2	3	0	46	53	#NULL!	24	35	782	0	2	2		24	0	0	#NULL!	0	0	14.5	14.5	1	1	0	0	#NULL!	1	1
63	1	1	3	2	2	1	0	0	0	0	0	2	3	0	29	23	#NULL!	#NULL!	#NULL!	712	0	2	2		17	#NULL!	#NULL!	#NULL!	0	1	13.75	13.6667	1	1	0	1	#NULL!	1	2
35	2	1	3	1	2	3	0	0	0	0	0	2	3	0	11	18	#NULL!	17	22	183	0	2	2		23	0	0	#NULL!	0	0	12.6667	12.6667	1	1	1	0	0	0	1
39	2	1	3	2	2	3	0	0	0	0	0	2	3	0	22	20	#NULL!	24	26	819	0	2	2		21	0	0	#NULL!	0	0	15	15	1	1	0	0	0	0	1
45	2	1	3	4	3	4	#NULL!	0	0	0	0	2	3	0	49	53	6	47	35	557	0	2	2		21	0	0	1	1	0	18	18	1	1	0	0	0	0	1
52	2	1	3	2	2	1	0	0	0	0	0	2	3	0	44	38	4	#NULL!	27.4	622	0	2	2		21	#NULL!	0	1	1	1	17.3333	17.3333	1	1	0	0	#NULL!	1	1
45	2	1	3	4	2	1	0	0	0	0	0	2	3	0	26	30	#NULL!	60	49	939	0	2	2		21	0	0	#NULL!	0	0	17.4167	17.4167	1	1	0	0	#NULL!	1	1
56	2	1	3	4	3	1	0	0	0	0	0	2	2	0	44	38	3	27.4	32.1	622	0	2	2		17	0	0	0	0	1	19.5833	18.5833	1	1	0	1	#NULL!	1	2
56	2	1	3	4	1	1	0	0	0	0	0	2	3	0	13	22	#NULL!	23	28	1020	0	2	2		22	0	0	#NULL!	0	1	18.1667	18.1667	1	1	0	0	#NULL!	1	1
39	2	1	1	2	4	1	0	0	0	0	0	2	3	0	31	21	#NULL!	33	16	828	0	2	2		21	0	0	#NULL!	0	0	18.25	18.25	1	1	0	0	#NULL!	1	1
45	2	1	3	4	1	1	1	0	0	0	0	2	3	0	69	49	5	30	25	915	0	2	2		22	1	0	1	1	0	17.4167	17.4167	1	1	0	0	#NULL!	1	1
72	2	1	3	4	1	4	0	0	0	0	0	2	3	0	27	42	#NULL!	23	28	720	0	2	2		19	0	0	#NULL!	0	1	19.9167	19.9167	1	1	0	0	#NULL!	0	1
50	1	1	1	2	5	1	1	0	0	0	0	2	4	0	67	76	4	#NULL!	#NULL!	160	0	2	2	Hi	26	1	1	1	1	0	#NULL!	#NULL!	#NULL!	#NULL!	1	0	0	1	3
38	2	1	3	2	3	1	1	0	0	0	0	2	3	0	86	55	2	21	24	1490	0	2	2		21	1	0	0	1	0	1.5	1.5	0	0	0	0	0	1	1
22	1	1	2	1	3	1	0	0	0	0	0	2	3	0	24	45	#NULL!	#NULL!	#NULL!	595	0	2	2		21	#NULL!	#NULL!	#NULL!	0	0	1.41667	0.833333	0	0	0	0	0	1	1
65	2	1	2	3	1	1	0	#NULL!	0	0	0	2	3	0	40	41	3.6	#NULL!	37.5	550	0	2	2		16	#NULL!	0	1	1	1	0.25	1.66667	0	0	0	1	0	1	2
32	1	1	3	1	3	4	0	0	0	0	0	2	3	0	42	35	7	15	29	257	0	2	2		19	0	0	1	1	0	18	16.5833	1	1	0	0	#NULL!	0	1
34	2	1	3	3	2	1	0	0	0	0	0	2	3	0	27	24	1	16	34	464	0	2	2		21	0	0	0	0	0	11.5833	11.5833	1	1	0	0	#NULL!	1	1
70	2	1	3	4	1	1	0	0	0	0	0	2	3	0	15	8	#NULL!	18	21	240	0	2	2		17.5	0	0	#NULL!	0	1	1.58333	1.58333	0	0	0	1	0	1	2
60	2	1	2	3	1	4	1	0	0	0	0	2	3	0	27	30	2	17	25	340	0	2	2		26.5	0	0	0	0	1	1.58333	1.58333	0	0	0	0	0	0	3
40	2	1	2	3	1	1	0	0	0	0	0	2	3	0	16	26	#NULL!	33	32	294	0	2	2		26.5	0	0	#NULL!	0	0	0.666667	0.666667	0	0	0	0	0	1	3
69	2	1	2	4	1	1	0	0	0	0	0	2	3	0	23	30	#NULL!	32	45	622	0	2	2		18.5	0	0	#NULL!	0	1	1.58333	1.58333	0	0	0	0	#NULL!	1	1
42	1	1	2	3	3	1	0	0	0	1	0	2	3	0	27.1	25	0.305	#NULL!	#NULL!	380	0	1	2		39.6	#NULL!	#NULL!	0	0	0	#NULL!	#NULL!	#NULL!	#NULL!	0	0	0	1	3
50	2	1	3	2	1	4	0	0	0	0	0	2	3	0	79	76	#NULL!	25	28	358	0	2	2		18.5	1	1	#NULL!	1	0	1.5	1.08333	0	0	0	0	0	0	1
77	1	1	2	4	3	1	0	0	0	0	0	2	3	0	17	23	#NULL!	40	37	725	0	2	2		23	0	0	#NULL!	0	1	1.66667	1.66667	0	0	0	0	0	1	1
51	1	1	3	2	4	1	0	0	0	0	0	2	3	0	23	44	#NULL!	26	37	456	0	2	2		28	0	0	#NULL!	0	1	15.5833	14	1	1	0	0	#NULL!	1	3
26	1	0	2	2	3	1	0	0	0	0	0	2	3	0	79	73	2	34	33	587	0	2	2		17	1	1	0	1	0	1.5	1	0	0	0	1	0	1	2
28	1	1	2	1	3	4	0	0	0	0	0	2	3	0	25	36	3	18	22	573	0	2	2		21	0	0	0	0	0	1.41667	1.33333	0	0	0	0	0	0	1
56	2	0	3	4	1	1	0	0	0	0	0	2	#NULL!	0	27	26	#NULL!	#NULL!	#NULL!	395	0	2	2		23	#NULL!	#NULL!	#NULL!	0	1	#NULL!	#NULL!	#NULL!	#NULL!	0	0	0	1	1
43	1	1	2	3	2	1	0	0	1	0	0	1	3	0	19	23	#NULL!	#NULL!	#NULL!	524	0	2	2		22.6	#NULL!	#NULL!	#NULL!	0	0	#NULL!	#NULL!	#NULL!	#NULL!	0	0	0	1	1
65	2	0	3	4	1	1	0	0	0	0	0	2	3	0	38	35	#NULL!	#NULL!	#NULL!	465	0	2	2		22	#NULL!	#NULL!	#NULL!	0	1	1.41667	1.16667	0	0	0	0	0	1	1
52	1	1	2	2	1	1	0	0	0	0	0	2	3	0	20	24	#NULL!	29	33	699	0	2	2		20	0	0	#NULL!	0	1	1.16667	1.16667	0	0	0	0	1	1	1
50	2	1	3	2	1	1	0	0	0	0	0	2	3	0	20	24	#NULL!	7	23	1097	0	2	2		19.5	0	0	#NULL!	0	0	1.41667	1.16667	0	0	0	0	0	1	1
55	1	1	2	3	3	1	1	0	0	0	0	2	3	0	38	31	#NULL!	20	22	1536	0	2	2		26	0	0	#NULL!	0	1	1.41667	1	0	0	0	0	0	1	3
52	1	1	3	2	4	1	0	0	0	0	0	2	3	0	38	45	3.5	34	24	838	0	2	2		28	0	0	1	1	1	7.91667	7.91667	1	1	0	0	0	1	3
45	1	1	#NULL!	3	1	1	1	0	0	1	0	2	3	0	49	40	3.9	25	23	471	0	2	2		18	0	0	1	1	0	16.25	16.25	1	1	0	1	0	1	2
31	2	1	3	2	2	1	1	0	0	0	0	2	3	0	27	38	#NULL!	25	33	570	0	2	2		26	0	0	#NULL!	0	0	7.91667	7.91667	1	1	0	0	0	1	3
36	1	1	3	4	3	1	1	0	0	0	0	2	3	0	34	45	1	28	#NULL!	544	0	2	2		26	0	#NULL!	0	0	0	3.33333	3.5	0	1	0	0	0	1	3
45	1	1	3	#NULL!	#NULL!	4	#NULL!	0	0	0	0	2	3	0	17	27	#NULL!	28	34	562	0	0	2		24	0	0	#NULL!	0	0	11.1667	11.1667	1	1	0	0	1	0	1
40	2	1	3	2	2	1	1	0	0	1	0	2	3	0	120	38	2	9	32	826	0	2	2		26	1	0	0	1	0	16.5833	16.5833	1	1	0	0	1	1	3
52	1	1	1	2	4	1	1	0	0	0	0	2	3	0	45	40	4	32	38	359	0	2	2		28	0	0	1	1	1	19.4167	19.5	1	1	0	0	0	1	3
22	2	1	3	1	3	1	1	0	0	0	0	2	3	0	84.98	79.63	4	#NULL!	#NULL!	158	0	0	0	Normal	25	1	1	1	1	0	1.58333	1.58333	0	0	1	0	0	1	3
54	1	1	3	2	2	4	1	0	0	0	0	2	3	0	46	61	5	19	25	317	1	0	0		17	0	1	1	1	1	19.1667	17.5833	1	1	0	1	0	0	2
46	1	1	3	2	2	1	1	0	0	0	0	2	#NULL!	0	27	33	2	41	82	275	0	0	2		22	0	1	0	1	0	16.9167	16.9167	1	1	0	0	0	1	1
49	2	1	3	2	3	3	0	0	0	0	0	2	3	0	28.28	20.58	2	13	23	560	0	0	0	Normal	18	0	0	0	0	0	17.3333	17.3333	1	1	0	1	1	0	2
67	2	1	3	4	1	1	0	0	0	0	0	2	3	0	47	82	#NULL!	21	34	603	0	0	2		17	0	1	#NULL!	1	1	18.6667	16.9167	1	1	0	1	1	1	2
47	2	1	2	2	1	1	0	0	0	0	0	2	3	2	13	17	#NULL!	21	24	332	0	2	2		19.5	0	0	#NULL!	0	0	1.66667	1.66667	0	0	0	0	0	1	1
18	1	1	3	1	3	5	0	0	0	0	0	2	3	0	23	24	#NULL!	15	24	658	0	2	2		20	0	0	#NULL!	0	0	1.5	1.41667	0	0	0	0	0	1	1
46	2	1	3	1	2	1	0	0	0	0	0	2	3	0	27	43	#NULL!	23	42	543	0	0	2		26	0	0	#NULL!	0	0	16.6667	14.5833	1	1	0	0	1	1	3
51	2	1	3	2	2	1	0	0	0	0	0	2	3	0	20	19	0.5	45	30	641	0	0	0		24	0	0	0	0	1	17.8333	15.4167	1	1	0	0	0	1	1
34	2	1	3	1	2	1	0	0	0	0	0	2	3	0	32	42	3	24	27	685	0	2	2		24	0	0	0	0	0	16.9167	15.5833	1	1	0	0	0	1	1
43	2	1	3	2	2	1	#NULL!	0	0	0	0	2	3	0	22	29	#NULL!	32	43	346	0	2	2		24	0	0	#NULL!	0	0	17.8333	15	1	1	0	0	1	1	1
70	2	1	3	2	1	1	1	0	0	0	0	2	3	0	49	39	5	27	55	257	0	2	2		19	0	0	1	1	1	18.25	18.25	1	1	0	1	1	1	1
34	2	1	3	2	2	1	1	0	0	0	0	2	3	0	50	38	8	30	26	435	0	0	2		18	0	0	1	1	0	16	11.4167	1	1	0	1	1	1	2
50	2	1	3	1	1	1	0	0	0	0	0	2	3	0	28	29	#NULL!	40	23	428	0	0	2		25	0	0	#NULL!	0	0	19.1667	19.1667	1	1	0	0	1	1	3
40	2	1	3	2	2	1	0	0	0	0	0	2	3	0	20	23	#NULL!	21	25	937	0	0	2		21	0	0	#NULL!	0	0	17.5	17.5	1	1	0	0	1	1	1
38	2	0	3	2	2	1	0	0	0	0	0	1	3	0	32	16	#NULL!	17	42	210	1	2	2		25	0	0	#NULL!	0	0	#NULL!	#NULL!	#NULL!	#NULL!	0	0	0	1	3
33	2	0	3	3	2	1	0	0	0	0	0	2	3	0	25	22	#NULL!	#NULL!	#NULL!	450	0	2	2		21	#NULL!	#NULL!	#NULL!	0	0	#NULL!	#NULL!	#NULL!	#NULL!	0	0	1	1	1
48	2	1	2	2	2	1	0	0	0	0	0	1	3	0	23	21	#NULL!	#NULL!	#NULL!	264	0	2	2		24.6	#NULL!	#NULL!	#NULL!	0	0	#NULL!	#NULL!	#NULL!	#NULL!	0	0	0	1	1
52	2	0	3	4	1	1	1	0	0	0	0	2	3	0	32	29	3	#NULL!	#NULL!	389	0	2	2		26	#NULL!	#NULL!	0	0	1	17	17	1	1	0	0	0	1	3
62	1	0	3	4	1	1	#NULL!	0	0	0	0	2	3	0	27	21	#NULL!	#NULL!	#NULL!	420	0	2	2		20	#NULL!	#NULL!	#NULL!	0	1	1.33333	1.16667	0	0	0	0	1	1	1
53	2	1	2	3	2	4	0	0	0	0	0	2	3	0	34	19	#NULL!	#NULL!	#NULL!	456	0	2	2	Normal	19.8	#NULL!	#NULL!	#NULL!	0	1	17.9167	15.1667	1	1	0	0	0	0	1
38	1	1	1	2	5	1	1	0	1	1	0	2	3	0	43	31	4	#NULL!	#NULL!	393	0	2	2	Normal	23.5	#NULL!	#NULL!	1	1	0	17	11.75	1	1	0	0	0	1	1
46	2	1	2	3	2	1	0	0	0	0	0	2	3	0	29	17	#NULL!	#NULL!	#NULL!	310	0	2	2		22	#NULL!	#NULL!	#NULL!	0	0	18.5	18.5	1	1	0	0	0	1	1
35	2	1	2	3	3	4	0	0	0	1	0	1	3	0	32	25	#NULL!	#NULL!	#NULL!	378	1	2	2		23.4	#NULL!	#NULL!	#NULL!	0	0	17.8333	17.8333	1	1	0	0	0	0	1
44	2	1	2	2	3	1	1	0	0	0	0	2	3	0	28	25	3	36	33	847	0	0	2		22	0	0	0	0	0	19.5833	19.5833	1	1	0	0	0	1	1
45	1	0	3	4	2	1	0	0	0	1	0	2	3	0	30	22	2	34	26	552	0	2	2		23.4	0	0	0	0	0	#NULL!	#NULL!	#NULL!	#NULL!	0	0	0	1	1
42	2	1	2	3	1	1	0	0	0	0	0	2	3	0	19	17	#NULL!	#NULL!	#NULL!	200	#NULL!	0	2		23	#NULL!	#NULL!	#NULL!	0	0	1.33333	0.666667	0	0	0	0	0	1	1
61	1	1	3	2	4	4	0	0	0	0	0	2	3	0	13	23	#NULL!	#NULL!	#NULL!	527	0	2	2		22	#NULL!	#NULL!	#NULL!	0	1	1.58333	1.5	0	0	0	0	0	0	1
67	2	0	3	4	1	1	0	0	0	0	0	2	3	0	22	17	#NULL!	#NULL!	#NULL!	648	0	2	2		19	#NULL!	#NULL!	#NULL!	0	1	1.33333	1.16667	0	0	0	0	0	1	1
38	2	1	2	2	3	1	0	0	0	0	#NULL!	2	3	0	26	31	#NULL!	21	31	794	0	0	2		34	0	0	#NULL!	0	0	17.9167	15.1667	1	1	0	0	1	1	3
38	2	1	2	3	2	1	0	0	0	0	0	2	3	0	23	13	#NULL!	36	56	518	0	0	2		21	0	0	#NULL!	0	0	17	11.75	1	1	0	0	0	1	1
39	1	1	3	4	2	1	0	0	0	0	0	2	3	0	24	25	#NULL!	22	23	503	0	2	2		23	0	0	#NULL!	0	0	18.5	18.5	1	1	0	0	0	1	1
45	1	1	3	2	3	1	0	0	0	0	0	2	#NULL!	#NULL!	18	30.8	#NULL!	24	20	608	#NULL!	0	2		25	0	0	#NULL!	0	0	17.8333	17.8333	1	1	0	0	0	1	3
51	1	1	3	2	3	1	1	0	0	0	0	2	3	0	42	47	2	38	38	367	0	0	0		24	0	0	0	0	1	18.6667	15.5833	1	1	0	0	0	1	1
45	2	1	3	2	2	1	0	0	0	0	0	2	3	0	56	38	#NULL!	45	15	624	0	2	2	Normal	23.6	0	0	#NULL!	0	0	#NULL!	#NULL!	#NULL!	#NULL!	0	0	0	1	1
21	2	1	3	1	3	6	0	0	0	0	0	1	3	0	40	22	#NULL!	23	33	891	1	0	0	Normal	26.4	0	0	#NULL!	0	0	#NULL!	#NULL!	#NULL!	#NULL!	0	0	1	1	3
39	2	1	2	2	2	1	0	0	0	0	0	2	3	0	29	33	#NULL!	#NULL!	#NULL!	369	0	0	#NULL!	Normal	24.2	#NULL!	#NULL!	#NULL!	0	0	#NULL!	#NULL!	#NULL!	#NULL!	0	0	1	1	1
52	1	0	3	2	1	4	0	0	0	0	0	2	3	0	20	22	#NULL!	29	22	526	0	0	#NULL!		22.3	0	0	#NULL!	0	1	#NULL!	#NULL!	#NULL!	#NULL!	0	0	0	0	1
49	2	0	3	4	1	1	1	0	0	0	0	2	3	0	23	15	#NULL!	30	18	450	0	#NULL!	#NULL!	Normal	22.9	0	0	#NULL!	0	0	16.5	15.8333	1	1	0	0	1	1	1
36	1	1	2	2	3	1	0	0	1	0	0	2	3	0	45	17	6	#NULL!	#NULL!	490	0	2	2		23.4	#NULL!	#NULL!	1	1	0	11.8333	11.8333	1	1	0	0	0	1	1
48	2	0	3	3	1	3	0	0	0	0	0	2	3	0	22	24	#NULL!	#NULL!	#NULL!	368	0	2	2		21	#NULL!	#NULL!	#NULL!	0	0	#NULL!	#NULL!	#NULL!	#NULL!	0	0	0	0	1
55	1	0	3	2	2	1	1	0	0	1	0	2	3	0	48	16	#NULL!	29	22	437	0	2	2		22.5	0	0	#NULL!	0	1	16.25	16.25	1	1	0	0	0	1	1
38	1	1	2	2	3	3	0	0	1	1	0	2	3	0	41	28	#NULL!	30	17	387	0	0	#NULL!	Normal	21.3	0	0	#NULL!	0	0	7.91667	7.91667	1	1	0	0	0	0	1
42	2	1	2	4	2	4	0	0	0	0	0	2	3	0	19	15	#NULL!	#NULL!	#NULL!	553	0	2	2		23.4	#NULL!	#NULL!	#NULL!	0	0	3.33333	3.5	0	1	0	0	0	0	1
46	1	1	2	1	2	1	0	0	0	1	0	2	3	0	45	32	3	29	27	710	0	2	2		24.4	0	0	0	0	0	11.1667	11.1667	1	1	0	0	0	1	1
62	2	1	3	4	2	1	0	0	0	0	0	2	#NULL!	0	25	18	2	#NULL!	#NULL!	388	0	2	2		16.6	#NULL!	#NULL!	0	0	1	16.5833	16.5833	1	1	0	1	0	1	2
55	2	0	3	4	1	1	0	0	0	0	0	2	3	0	33	24	#NULL!	#NULL!	#NULL!	440	0	2	2		20.8	#NULL!	#NULL!	#NULL!	0	1	19.4167	19.5	1	1	0	0	1	1	1
36	1	1	3	2	2	1	0	0	0	1	0	2	3	0	19	20	#NULL!	21	25	389	0	2	2		23.7	0	0	#NULL!	0	0	1.58333	1.58333	0	0	0	0	0	1	1
43	2	1	2	2	2	1	0	0	0	0	0	2	#NULL!	0	28	18	#NULL!	#NULL!	#NULL!	574	0	2	2		25	#NULL!	#NULL!	#NULL!	0	0	19.1667	17.5833	1	1	0	0	0	1	3
40	1	1	1	2	4	1	0	0	0	1	0	2	3	0	26	31	#NULL!	#NULL!	#NULL!	482	0	2	2		23	#NULL!	#NULL!	#NULL!	0	0	16.9167	16.9167	1	1	0	0	0	1	1
28	2	1	2	1	2	4	0	0	1	1	0	1	3	0	32	21	#NULL!	#NULL!	#NULL!	397	0	2	2		25	#NULL!	#NULL!	#NULL!	0	0	17.3333	17.3333	1	1	0	0	0	0	3
45	2	0	3	2	2	1	1	0	0	0	0	2	3	0	44	22	1	36	31	451	0	0	#NULL!		23.8	0	0	0	0	0	18.6667	16.9167	1	1	0	0	0	1	1
60	1	0	3	2	1	1	0	0	0	1	0	2	#NULL!	0	28	29	#NULL!	#NULL!	#NULL!	388	0	2	2		20.7	#NULL!	#NULL!	#NULL!	0	1	1.66667	1.66667	0	0	0	0	0	1	1
37	2	1	2	3	2	4	0	0	0	0	0	2	3	0	26	20	#NULL!	#NULL!	#NULL!	612	0	2	2	Normal	24	#NULL!	#NULL!	#NULL!	0	0	1.5	1.41667	0	0	0	0	0	0	1
22	2	0	3	2	2	1	0	0	0	0	0	2	#NULL!	0	20	30	3	#NULL!	#NULL!	340	0	0	0		22	#NULL!	#NULL!	0	0	0	16.6667	14.5833	1	1	0	0	0	1	1
30	1	1	2	2	4	1	0	0	0	0	0	3	#NULL!	1	20	24	#NULL!	#NULL!	#NULL!	330	0	2	2		20	#NULL!	#NULL!	#NULL!	0	0	17.8333	15.4167	1	1	0	0	0	1	1
41	2	0	3	2	2	1	0	0	0	0	0	2	3	0	40	23	#NULL!	27	23	845	0	2	2	Normal	22.8	0	0	#NULL!	0	0	16.9167	15.5833	1	1	0	0	0	1	1
53	1	1	3	2	2	1	1	0	0	1	0	2	3	0	21.8	30.3	#NULL!	23	18	577	0	2	2		22	0	0	#NULL!	0	1	#NULL!	#NULL!	#NULL!	#NULL!	0	0	0	1	1
53	1	1	3	2	2	1	1	0	0	1	0	2	3	0	21.8	30.3	#NULL!	23	18	577	0	2	2		22.6	0	0	#NULL!	0	1	16.25	16.25	1	1	0	0	0	1	1
40	2	0	3	4	2	1	1	0	0	0	0	2	3	0	22.2	28	#NULL!	19	14	734	0	0	#NULL!	Normal	23.5	0	0	#NULL!	0	0	7.91667	7.91667	1	1	0	0	1	1	1
62	2	0	3	4	1	1	0	0	0	0	0	2	3	0	9	29	#NULL!	41	28.5	759	0	2	2		25	0	0	#NULL!	0	1	3.33333	3.5	0	1	0	0	0	1	3
30	2	1	2	2	2	1	0	0	0	0	0	2	3	0	22	26.4	#NULL!	#NULL!	#NULL!	941	0	0	2	Normal	22	#NULL!	#NULL!	#NULL!	0	0	11.1667	11.1667	1	1	0	0	0	1	1
52	2	1	3	3	1	1	0	0	0	0	0	2	#NULL!	0	22	20	#NULL!	18	28	519	0	0	2	Normal	21.6	0	0	#NULL!	0	1	16.5833	16.5833	1	1	0	0	0	1	1
36	2	1	1	2	4	1	1	0	0	0	0	2	3	0	23	34	#NULL!	#NULL!	#NULL!	636	0	0	2	Normal	26.4	#NULL!	#NULL!	#NULL!	0	0	19.4167	19.5	1	1	0	0	0	1	3
45	2	1	2	2	3	1	1	0	0	0	0	2	3	0	221	200	6	29	36	1023	0	0	2	Normal	17.6	1	1	1	1	0	1.58333	1.58333	0	0	0	1	0	1	2
56	2	0	3	4	1	1	0	0	0	0	0	2	2	0	38	44	#NULL!	26	33	912	0	0	0		24.3	0	0	#NULL!	0	1	19.1667	17.5833	1	1	0	0	1	1	1
45	1	1	1	2	5	1	0	0	1	0	0	2	3	0	49	38	4	40	38	670	0	0	2		24.7	0	0	1	1	0	16.9167	16.9167	1	1	0	0	0	1	1
47	1	1	2	2	3	1	0	0	1	1	0	2	3	0	55	60	#NULL!	58	64	566	0	0	#NULL!	Moderate fatty liv	27.6	0	1	#NULL!	1	0	17.3333	17.3333	1	1	0	0	0	1	3
55	2	1	3	4	1	1	1	0	0	0	0	2	3	0	37	28	#NULL!	#NULL!	#NULL!	732	0	0	0		23.7	#NULL!	#NULL!	#NULL!	0	1	18.6667	16.9167	1	1	0	0	0	1	1
46	2	1	2	2	3	1	0	0	0	1	0	2	3	0	51	47	4	39	48	834	0	0	2	Mild fatty liver	28	0	0	1	1	0	1.66667	1.66667	0	0	0	0	0	1	3
44	2	1	2	2	2	1	0	0	0	1	0	2	3	0	55	18	#NULL!	50	21	478	0	0	2	Fatty liver	28.4	0	0	#NULL!	0	0	1.5	1.41667	0	0	0	0	0	1	3
39	2	0	2	2	2	1	0	0	0	0	0	2	3	0	19	14	#NULL!	#NULL!	#NULL!	823	0	0	0		22.5	#NULL!	#NULL!	#NULL!	0	0	16.6667	14.5833	1	1	0	0	0	1	1
66	1	0	3	4	1	1	1	0	0	1	0	2	3	0	33	18	#NULL!	#NULL!	#NULL!	489	0	2	2		24.8	#NULL!	#NULL!	#NULL!	0	1	17.8333	15.4167	1	1	0	0	0	1	1
38	2	1	2	3	2	4	1	0	0	0	0	2	3	0	19	11	#NULL!	23	16	675	0	0	2		21.4	0	0	#NULL!	0	0	#NULL!	#NULL!	#NULL!	#NULL!	0	0	0	0	1
55	2	0	3	4	1	1	0	0	0	0	0	2	3	0	36	21	#NULL!	29	18	446	0	2	2		19.8	0	0	#NULL!	0	1	11.1667	11.1667	1	1	0	0	0	1	1
55	2	0	3	3	2	1	0	0	0	0	0	2	#NULL!	0	35	20	#NULL!	50	45	390	#NULL!	2	2		20	0	0	#NULL!	0	1	16.5833	16.5833	1	1	0	0	0	1	1
28	1	1	2	3	3	4	0	0	0	0	0	2	3	0	36	71	#NULL!	47	77	305	0	2	2		20	0	1	#NULL!	1	0	19.4167	19.5	1	1	0	0	0	0	1
49	2	1	1	3	5	1	0	0	0	0	0	2	3	0	23	49	#NULL!	23	23	812	0	0	2	Normal liver	24.6	0	0	#NULL!	0	0	1.58333	1.58333	0	0	0	0	0	1	1
19	2	0	3	1	2	4	1	0	0	0	0	2	3	0	169	216	0.399	191	329	290	0	0	2	Mild fatty liver +	18	1	1	0	1	0	#NULL!	#NULL!	#NULL!	#NULL!	0	1	0	0	2
58	2	1	3	4	3	1	0	0	0	0	0	2	3	0	12	24	#NULL!	21	18	#NULL!	0	2	2		19.6	0	0	#NULL!	0	1	4.66667	4.66667	0	1	#NULL!	0	0	1	1
38	2	0	3	2	2	1	0	0	0	0	0	2	3	0	16	25	#NULL!	#NULL!	#NULL!	381	0	2	2		21	#NULL!	#NULL!	#NULL!	0	0	3.91667	3.91667	0	1	0	0	1	1	1
92	2	0	3	2	2	1	0	0	0	0	0	2	3	0	20	28	#NULL!	28	#NULL!	726	0	0	2	Normal liver	20.7	0	#NULL!	#NULL!	0	1	16.25	16.25	1	1	0	0	0	1	1
46	2	0	3	2	2	1	0	0	0	0	0	2	3	0	24.3	41.1	#NULL!	#NULL!	#NULL!	63	0	0	2	Normal liver	18.6	#NULL!	#NULL!	#NULL!	0	0	7.91667	7.91667	1	1	1	0	0	1	1
30	2	0	3	2	2	1	1	0	0	0	0	2	3	0	26.6	47.7	#NULL!	44.87	42.65	200	0	0	0		18.8	0	0	#NULL!	0	0	3.33333	3.5	0	1	0	0	0	1	1
30	2	0	3	3	3	1	0	0	0	0	0	2	3	0	27.3	42.9	#NULL!	27.7	35.7	499	0	1	2	R/o liver cirrhos	19.5	0	0	#NULL!	0	0	11.1667	11.1667	1	1	0	0	0	1	1
38	2	0	3	2	2	1	1	0	0	0	0	2	3	0	17.5	27.7	#NULL!	#NULL!	#NULL!	490	0	2	2		18.4	#NULL!	#NULL!	#NULL!	0	0	16.5833	16.5833	1	1	0	1	1	1	2
38	1	0	3	2	1	1	0	0	0	1	0	2	#NULL!	0	59.5	76.9	4	47.3	57.7	143	0	2	2		20.3	0	1	1	1	0	19.4167	19.5	1	1	1	0	0	1	1
30	1	0	2	2	3	1	1	0	0	1	0	2	3	0	82	72	5	37.3	17.7	523	0	0	0		22	1	1	1	1	0	1.58333	1.58333	0	0	0	0	0	1	1
18	1	1	3	1	3	1	0	0	0	0	0	2	3	0	37	61	#NULL!	38	64	583	0	0	0		18	0	1	#NULL!	1	0	19.1667	17.5833	1	1	0	1	1	1	2
23	1	1	3	1	3	1	1	0	0	0	0	2	3	0	61.9	58.6	3	#NULL!	#NULL!	115	0	0	2		20.4	1	#NULL!	0	1	0	16.9167	16.9167	1	1	1	0	0	1	1
46	1	1	2	2	2	1	1	0	0	1	0	2	3	0	33	16	#NULL!	34	27	624	0	0	2	Normal liver	21	0	0	#NULL!	0	0	17.3333	17.3333	1	1	0	0	0	1	1
65	2	1	3	4	3	1	0	0	0	0	0	2	3	0	11.7	41.3	#NULL!	#NULL!	#NULL!	315	0	0	0		17.8	#NULL!	#NULL!	#NULL!	0	1	18.6667	16.9167	1	1	0	1	1	1	2
48	2	1	2	2	3	1	0	0	0	0	0	2	3	0	18	29	#NULL!	9.4	18.3	256	0	0	2	Normal	18.4	0	0	#NULL!	0	0	1.66667	1.66667	0	0	0	1	0	1	2
39	2	0	3	2	2	1	0	0	0	0	0	2	3	0	40	32	2	29	#NULL!	423	0	2	2		20	0	#NULL!	0	0	0	13.4167	13.4167	1	1	0	0	0	1	1
35	2	1	2	2	2	1	1	0	0	0	0	2	3	0	124.5	110.5	#NULL!	77	165.8	550	0	0	2	Liver has homogene	17.7	1	1	#NULL!	1	0	#NULL!	#NULL!	#NULL!	#NULL!	0	1	0	1	2
65	1	0	2	2	2	1	1	0	0	1	0	2	3	0	128	89	#NULL!	#NULL!	#NULL!	397	0	2	2	Duffuce fatty live	17	1	1	#NULL!	1	1	18.0833	18.0833	1	1	0	1	0	1	2
45	1	0	3	2	2	1	1	0	0	1	0	2	3	0	70	74	4	44	29	189	0	2	2		22	1	1	1	1	0	1.33333	1.16667	0	0	1	0	0	1	1
35	2	1	2	2	2	1	0	0	0	0	0	2	3	0	19	21	#NULL!	23.4	18.8	635	0	2	2		25.4	0	0	#NULL!	0	0	17.9167	15.1667	1	1	0	0	0	1	3
48	2	1	2	2	3	1	0	0	0	0	0	2	3	0	1	12	#NULL!	1	23	583	0	2	2	Liver has homogeno	21	0	0	#NULL!	0	0	17	11.75	1	1	0	0	0	1	1
40	1	0	2	2	1	1	0	0	0	1	0	2	3	0	36.2	16.8	#NULL!	27	19	624	0	2	2		22.9	0	0	#NULL!	0	0	18.5	18.5	1	1	0	0	0	1	1
45	2	0	3	2	1	1	1	0	0	0	0	2	3	0	38.1	23.4	#NULL!	30.6	19.5	268	0	0	2		22	0	0	#NULL!	0	0	17.8333	17.8333	1	1	0	0	1	1	1
55	1	1	2	2	2	4	1	0	0	1	0	1	3	0	191	137	3	123	61	914	1	0	0		20	1	1	0	1	1	#NULL!	#NULL!	#NULL!	#NULL!	0	0	0	0	1
52	2	1	1	4	3	1	0	0	0	0	0	2	3	0	28	23	#NULL!	32	15	174	0	0	2		25.4	0	0	#NULL!	0	1	#NULL!	#NULL!	#NULL!	#NULL!	1	0	0	1	3
54	1	0	1	2	4	1	1	1	1	0	0	2	#NULL!	0	112	130	4	88	93	182	1	2	2		18	1	1	1	1	1	#NULL!	#NULL!	#NULL!	#NULL!	1	1	0	1	2
33	1	1	2	2	2	1	0	0	0	0	0	2	#NULL!	0	51	25	6	#NULL!	#NULL!	372	0	2	2		18	#NULL!	#NULL!	1	1	0	#NULL!	#NULL!	#NULL!	#NULL!	0	1	0	1	2
50	2	1	3	2	2	8	0	0	0	0	0	2	3	0	56.8	3.31	3.4	#NULL!	#NULL!	337	0	0	0	Liver is normal,di	25.4	#NULL!	#NULL!	1	1	0	#NULL!	#NULL!	#NULL!	#NULL!	0	0	0	0	3
26	1	1	2	2	3	1	0	0	0	1	0	2	3	0	14	35	#NULL!	16	32	508	1	0	2		22	0	0	#NULL!	0	0	13.75	13.75	1	1	0	0	0	1	1
34	2	1	2	2	2	1	1	0	0	0	0	2	#NULL!	0	14	9	#NULL!	25	14	382	#NULL!	2	2	Liver is normal	21.5	0	0	#NULL!	0	0	#NULL!	#NULL!	#NULL!	#NULL!	0	0	0	1	1
36	2	0	2	3	1	1	1	0	0	0	0	2	3	0	49	18	6	#NULL!	#NULL!	573	0	0	2		23.4	#NULL!	#NULL!	1	1	0	#NULL!	#NULL!	#NULL!	#NULL!	0	0	1	1	1
30	2	0	3	2	1	1	0	0	0	0	0	2	3	0	59.2	49.9	1	#NULL!	#NULL!	225	0	0	0		20	#NULL!	#NULL!	0	0	0	#NULL!	#NULL!	#NULL!	#NULL!	0	0	1	1	1
53	1	0	3	2	1	4	1	0	0	1	0	2	3	0	68.43	46.34	4	40.4	24.15	450	0	0	2		22	1	0	1	1	1	20	20	1	1	0	0	0	0	1
45	2	0	3	2	2	1	0	0	0	0	0	2	3	0	14.16	9.25	2	23.72	13.28	532	0	2	2		23.6	0	0	0	0	0	#NULL!	#NULL!	#NULL!	#NULL!	0	0	0	1	1
60	2	1	3	4	2	4	1	0	0	0	0	2	3	0	35	34	7	29	17	425	0	2	2		18.2	0	0	1	1	1	#NULL!	#NULL!	#NULL!	#NULL!	0	1	1	0	2
41	1	1	2	2	2	3	0	0	1	1	0	2	#NULL!	0	43	44	2	#NULL!	#NULL!	624	0	2	2		24.6	#NULL!	#NULL!	0	0	0	#NULL!	#NULL!	#NULL!	#NULL!	0	0	0	0	1
55	2	0	3	4	1	1	0	0	0	0	0	2	3	0	46	53	1.32	#NULL!	#NULL!	179	0	0	2		19.8	#NULL!	#NULL!	0	0	1	#NULL!	#NULL!	#NULL!	#NULL!	1	0	1	1	1
28	1	1	2	1	3	4	0	0	1	0	0	2	3	0	39.21	38.41	#NULL!	#NULL!	#NULL!	632	0	0	0		19.4	#NULL!	#NULL!	#NULL!	0	0	16.25	16.25	1	1	0	0	0	0	1
28	2	1	2	1	3	1	0	0	0	0	0	2	3	0	34	17	1	32	24	542	0	2	2		23.64	0	0	0	0	0	7.91667	7.91667	1	1	0	0	0	1	1
46	2	1	2	2	2	1	1	0	0	0	0	2	3	0	191	102	9	188	110	237	0	0	0	Mild fatty liver	26.4	1	1	1	1	0	3.33333	3.5	0	1	0	0	0	1	3
56	2	0	3	3	1	4	0	0	0	0	0	2	3	0	59	64	4	40	55	421	0	2	2		23.7	0	1	1	1	1	11.1667	11.1667	1	1	0	0	1	0	1
39	2	1	2	2	3	1	1	0	0	1	0	2	#NULL!	0	46	40	3.1	#NULL!	#NULL!	634	#NULL!	2	2		24	#NULL!	#NULL!	1	1	0	16.5833	16.5833	1	1	0	0	0	1	1
60	1	1	2	4	2	1	1	0	1	0	0	2	#NULL!	0	70	78	2	56	66	300	0	2	2	Fatty liver diseas	24	1	1	0	1	1	19.4167	19.5	1	1	0	0	0	1	1
28	2	0	3	2	3	4	0	1	1	1	0	3	#NULL!	2	34	32	2	#NULL!	#NULL!	350	0	0	0		22	#NULL!	#NULL!	0	0	0	1.58333	1.58333	0	0	0	0	0	0	1
33	2	1	2	2	1	1	1	0	0	0	0	3	#NULL!	0	33	32	#NULL!	#NULL!	#NULL!	260	0	0	0		18	#NULL!	#NULL!	#NULL!	0	0	19.1667	17.5833	1	1	0	1	0	1	2
36	1	1	1	3	3	1	1	0	0	0	0	2	#NULL!	0	66	70	#NULL!	100	98	240	0	0	0	Features of acuute	17	1	1	#NULL!	1	0	16.9167	16.9167	1	1	0	1	0	1	2
36	2	0	3	2	2	1	0	0	0	0	0	3	#NULL!	0	23	20	#NULL!	#NULL!	#NULL!	340	0	2	2		20	#NULL!	#NULL!	#NULL!	0	0	17.3333	17.3333	1	1	0	0	0	1	1
55	1	1	1	3	4	1	0	0	0	0	0	3	#NULL!	2	16	22	#NULL!	#NULL!	#NULL!	300	0	2	2		20	#NULL!	#NULL!	#NULL!	0	1	18.6667	16.9167	1	1	0	0	0	1	1
36	2	0	2	2	3	1	0	0	0	0	0	2	#NULL!	0	35	34	#NULL!	#NULL!	#NULL!	298	0	2	2		19	#NULL!	#NULL!	#NULL!	0	0	1.66667	1.66667	0	0	0	0	0	1	1
35	1	1	2	3	3	1	1	0	0	0	0	2	#NULL!	1	25	35	#NULL!	#NULL!	#NULL!	200	1	2	2		19	#NULL!	#NULL!	#NULL!	0	0	1.5	1.41667	0	0	0	0	0	1	1
65	1	0	3	4	2	1	1	0	1	0	1	2	#NULL!	0	55	56	6	#NULL!	#NULL!	190	0	2	2		17	#NULL!	#NULL!	1	1	1	16.6667	14.5833	1	1	1	1	0	1	2
18	1	1	3	1	3	1	0	0	0	0	0	3	#NULL!	0	32	23	#NULL!	#NULL!	#NULL!	180	1	2	2		17	#NULL!	#NULL!	#NULL!	0	0	17.8333	15.4167	1	1	1	1	1	1	2
28	1	0	3	1	1	1	0	0	0	0	0	1	#NULL!	0	34	23	3	#NULL!	#NULL!	260	0	2	2		23	#NULL!	#NULL!	0	0	0	16.9167	15.5833	1	1	0	0	0	1	1
66	2	1	2	3	3	3	1	0	0	1	1	2	#NULL!	1	33	46	2	#NULL!	#NULL!	260	0	0	0	Fatty liver diseas	28	#NULL!	#NULL!	0	0	1	#NULL!	#NULL!	#NULL!	#NULL!	0	0	0	0	3
55	1	1	1	2	4	1	1	1	1	0	0	2	#NULL!	2	55	67	7	78	88	150	1	1	0	Cirrhotic liver	16	1	1	1	1	1	#NULL!	#NULL!	#NULL!	#NULL!	1	1	0	1	2
32	2	0	2	2	1	1	0	0	0	0	0	1	#NULL!	0	23	33	#NULL!	#NULL!	#NULL!	190	1	2	2		16	#NULL!	#NULL!	#NULL!	0	0	#NULL!	#NULL!	#NULL!	#NULL!	1	1	0	1	2
45	2	0	3	2	1	1	0	0	0	0	0	2	#NULL!	0	33	22	#NULL!	#NULL!	#NULL!	320	0	2	2		20	#NULL!	#NULL!	#NULL!	0	0	#NULL!	#NULL!	#NULL!	#NULL!	0	0	0	1	1
40	1	1	3	2	3	1	0	0	0	0	0	2	#NULL!	0	33	18	#NULL!	#NULL!	#NULL!	230	0	2	2		22	#NULL!	#NULL!	#NULL!	0	0	#NULL!	#NULL!	#NULL!	#NULL!	0	0	0	1	1
44	1	0	3	2	2	1	0	0	0	0	0	2	#NULL!	2	40	34	5	#NULL!	#NULL!	220	0	0	0		16	#NULL!	#NULL!	1	1	0	#NULL!	#NULL!	#NULL!	#NULL!	0	1	0	1	2
29	1	0	1	2	4	7	0	0	0	0	0	2	#NULL!	0	33	32	#NULL!	#NULL!	#NULL!	240	0	2	2		20	#NULL!	#NULL!	#NULL!	0	0	#NULL!	#NULL!	#NULL!	#NULL!	0	0	0	0	1
39	2	1	2	1	3	1	0	0	0	0	0	1	#NULL!	1	23	17	#NULL!	#NULL!	#NULL!	290	0	0	0		27	#NULL!	#NULL!	#NULL!	0	0	#NULL!	#NULL!	#NULL!	#NULL!	0	0	0	1	3
66	1	1	3	4	2	1	1	0	0	0	0	2	#NULL!	0	45	48	3	#NULL!	#NULL!	300	0	0	0		23	#NULL!	#NULL!	0	0	1	4.83333	4.16667	0	1	0	0	0	1	1
36	2	1	1	2	5	3	1	0	0	0	0	3	#NULL!	1	34	28	2	#NULL!	#NULL!	189	#NULL!	1	0	Enlarged liver	26	#NULL!	#NULL!	0	0	0	1.33333	1.16667	0	0	1	0	0	0	3
38	1	1	2	2	3	1	0	0	0	0	0	3	#NULL!	1	34	25	1	#NULL!	#NULL!	223	0	0	0		20	#NULL!	#NULL!	0	0	0	17.9167	15.1667	1	1	0	0	0	1	1
30	2	1	3	3	3	1	0	0	0	0	0	3	#NULL!	2	33	23	#NULL!	#NULL!	#NULL!	240	0	0	0		20	#NULL!	#NULL!	#NULL!	0	0	17	11.75	1	1	0	0	0	1	1
50	1	1	2	1	5	1	1	1	0	1	0	1	#NULL!	0	46	57	#NULL!	#NULL!	#NULL!	290	0	0	0		24	#NULL!	#NULL!	#NULL!	0	0	18.5	18.5	1	1	0	0	0	1	1
60	1	1	3	4	1	1	1	0	1	0	0	3	#NULL!	0	170	145	12	126	135	102	1	0	0	Cirrhotic liver	19	1	1	1	1	1	17.8333	17.8333	1	1	1	0	1	1	1
